# Supplementary material
Source: Springer Nature journal article supplement (https://www.springermedizin.de/resource/supplementary/12890_2014_627_MOESM7_ESM.pdf/9505444)
Supplement: MOESM7 [file 9505444]

# A Tissue fibrosis score in mice treated with sActRIIB-Fc

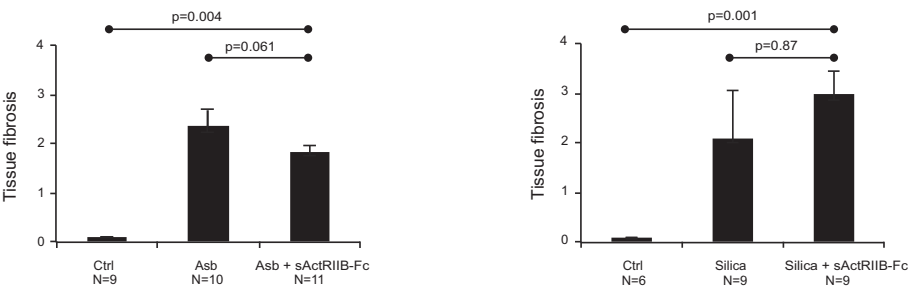

# B Representative micrographs of mouse lung exposed to silica and asbestos particles

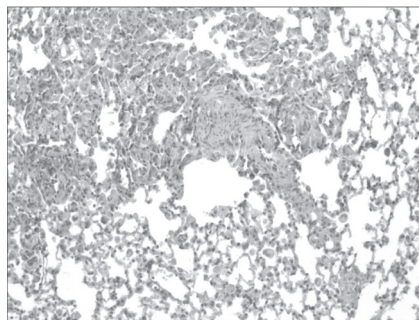

Asb

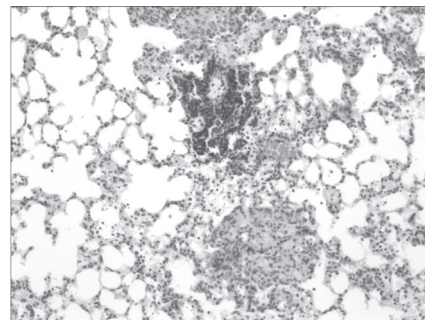

Silica

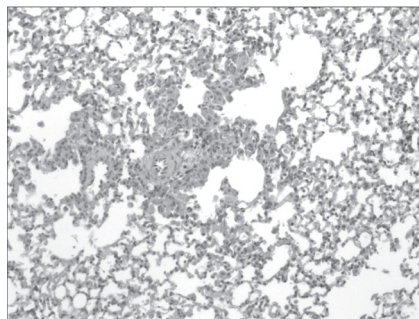

Asb + sActRIIB-Fc

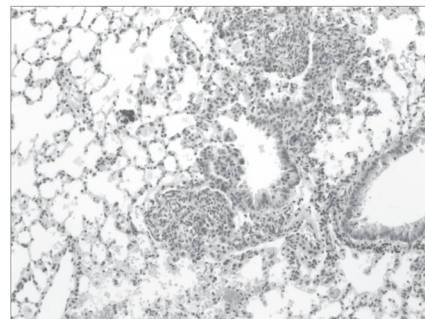

Silica + sActRIIB-Fc
